1 **Association of occupational exposure to chemical substances with bladder cancer in**

2 **Ethiopia: A multi-center matched case-control Study**

3 **Short title:** Occupational exposure to chemical substances and bladder cancer

4

5

6 Eleni Asfaw Kebede<sup>1\*</sup>, Tigist Workneh Leulseged<sup>2,3</sup>

7

8 <sup>1</sup> College of Health Sciences, Addis Ababa University, Addis Ababa, Ethiopia

9 <sup>2</sup> Medical Research Lounge (MRL), Addis Ababa, Ethiopia

10 <sup>3</sup> Department of Internal Medicine, St. Paul's Hospital Millennium Medical College, Addis  
11 Ababa, Ethiopia.

12

13

14 \*Corresponding author: Eleni Asfaw Kebede

15 Email address: [eleniasfaw14@gmail.com](mailto:eleniasfaw14@gmail.com) (EAK)

16 **ABSTRACT**

17 **Background:** Bladder cancer (BC) is the 10th most common cancer worldwide and ranks 13th  
18 in incidence in Ethiopia. Occupational exposure is the second leading cause of BC after smoking,  
19 accounting for 21%–27% of BC cases in men and 11% in women. This study aims to investigate  
20 the association between occupational exposure to chemical substances and bladder cancer among  
21 patients in selected hospitals in Ethiopia.

22  
23 **Methods:** A multi-center matched case-control study was conducted among patients admitted to  
24 four teaching hospitals in Addis Ababa, Ethiopia from May 01 to August 31 2023. Underlying  
25 characteristics between cases and controls were compared using Chi-square test and Mann-  
26 Whitney U test with statistical significance set at  $p \leq 0.05$ . A multivariable binary logistic  
27 regression analysis was run where adjusted odds ratios (AOR) with 95% confidence intervals  
28 (CIs), and p-values were used for significance testing and result interpretation.

29  
30 **Results:** Among the 303 patients studied, 90 (29.7%) were cases and 213 (70.3%) were controls.  
31 Age ( $\pm 5$  years), sex, and smoking status were matched in 68% of participants. The majority of  
32 the participants were age 60 years and above (62.2% of cases, 59.1% of controls), male (72% of  
33 cases, 73% of controls) and non-smokers (61.1% of cases, 64.8% of controls). Occupational  
34 exposure was not found to be significantly associated with BC (AOR:1.09; 95%CI= 0.44, 2.74;  
35  $P=0.85$ ). On the other hand, having a primary level education or higher (AOR:0.12 95%CI=  
36 0.05, 0.30;  $P<0.001$ ), consuming coffee for more than 20 years (AOR:2.36; 95% CI=1.22, 4.56;  
37  $P=0.01$ ) and regular analgesics use (AOR: 6.60; 95% CI=3.34, 13.02;  $p<0.001$ ) were found to be  
38 significantly associated with BC.

39

40 **Conclusions:** Occupational exposure to chemical substances was not found to be significantly  
41 associated with BC. However, having primary education or higher was protective, while long-  
42 term coffee consumption and regular analgesic use were significantly associated with BC. Health  
43 care professionals are advised to educate patients about safe analgesic use. Furthermore, future  
44 multicenter case-control studies should be conducted to further explore the potential associations  
45 of these factors with bladder cancer.

46

47 **Keywords:** Bladder cancer, occupational exposure, case-control design, binary logistic  
48 regression, Ethiopia

## 49 INTRODUCTION

50 Bladder cancer (BC) is the 10th most common cancer globally, with an increasing incidence  
51 worldwide (1). In 2020, there were over 573,000 new cases and 212,536 deaths due to BC (2).  
52 Based on the data from global cancer observatory 2022, in Ethiopia, BC ranked as the 13th most  
53 common cancer, with 1,647 new cases and 923 deaths in 2022 (3).

54

55 Occupational exposure to chemical substances, which is the second leading cause of BC after  
56 smoking, accounts for 21%-27% of cases in men and 11% in women (4, 5). A 2015 meta-  
57 analysis identified increased BC incidence in 42 out of 61 occupational classes, particularly  
58 among workers exposed to aromatic amines and polycyclic aromatic hydrocarbons (PAHs) (6).

59

60 While Western countries have experienced a decline in BC incidence attributed to the banning of  
61 occupational chemicals, developing countries encounter heightened risks due to urbanization,  
62 industrialization, and the transfer of manufacturing processes from developed nations (7).  
63 According to the International Labor Organization (ILO), only 5%-10% of workers in  
64 developing countries have access to occupational health services (OHS) (8). The lack of stringent  
65 occupational safety measures exacerbates the burden of BC in these countries (7).

66  
67 In addition, BC is associated with several risk factors, including male sex, older age, obesity, and  
68 genetic predispositions such as having a first-degree relative with BC and blood group O (5, 6, 9,  
69 10). Environmental factors, such as residence in industrialized areas, pelvic radiotherapy,  
70 cyclophosphamide chemotherapy, and chronic bladder infections, also contribute to BC risk (11,  
71 12, 13). Furthermore, *Schistosoma haematobium* infection is specifically linked to squamous cell  
72 carcinoma of the bladder (14). However, studies on the use of analgesics, water intake, coffee,  
73 and alcohol consumption have yielded mixed findings (11, 14, 15, 16, 17, 18, 19).

74  
75 Due to recent shifts in geographic disparities in BC burdens and its strong correlation with  
76 modifiable risk factors, it is essential to understand country-specific BC risk factors for tailored  
77 public health interventions. (20) However, such studies have not yet been conducted in Ethiopia.  
78 Therefore, the objective of this study was to examine the association of occupational exposure to  
79 chemical substances and bladder cancer among patients admitted to selected hospitals in Ethiopia  
80 from May 01 to August 31 2023.

## 81 **METHODS**

### 82 **Study Setting and Design**

83 A matched case-control study was conducted between May 01 and August 31 2023 at four  
84 hospitals in Addis Ababa, Ethiopia—Tikur Anbessa Specialized Hospital, St. Paul’s Hospital  
85 Millennium Medical College, Yekatit 12 Hospital Medical College, and Menelik II Referral  
86 Hospital. These hospitals were chosen using a random method from the 14 hospitals with  
87 urology departments in the setting.

### 88 **Population and Eligibility**

89 The source population comprised all adult patients admitted to either urology(cases) or non-  
90 urology departments (controls) in selected hospitals between May and August 2023. The study  
91 population for both cases and controls were determined by meeting the eligibility criteria.  
92 Eligible cases were patients diagnosed with histo-pathologically confirmed primary BC, while  
93 controls were patients meeting criteria of no history of bladder cancer or any other cancer, and  
94 absence of lower urinary tract symptoms. Age ( $\pm 5$  years), sex, and smoking status were matched  
95 in 68% of the participants.

### 96 **Sample Size Determination and Sampling Technique**

97 The sample size was calculated using the formula for case control study with categorical  
98 outcome, assuming a 95% confidence level, 80% power and a case-to-control ratio of 1:2.5.  
99 Proportions of exposure to high-risk jobs (textile, metal, and chemical industries) were derived  
100 from a previous study ( $P_2 = 0.35$ ,  $P_1 = 0.145$ ) (9). Additionally, a 10% non-response rate and a  
101 design effect of 1.5 were considered, resulting in a final sample size requirement of 323  
102 participants, comprising 92 cases and 231 controls.

103

104 For every two cases, five controls were randomly selected. Finally, a total of 90 cases and 213  
105 controls: Tikur Anbessa Specialized Hospital (50cases and 123controls), St. Paul's Hospital  
106 Millennium Medical College (18cases and 46 controls), Yekatit 12 Hospital Medical College  
107 (10cases and 20controls), and Menelik II Referral Hospital (12 cases and 24controls) were  
108 included in the study.

### 109 **Operational Definitions**

110 Occupational exposure was classified as follows:

111 • High-exposure occupations were characterized by exposure to substances like aromatic  
112 amines, amino-biphenyl, PAHs, and azo dyes. They included dye manufacturing, leather  
113 industry, painting, rubber industry, mechanics, printing industry, textile industry,  
114 metalworking, truck driving, aluminum industry, hairdressing, and transportation  
115 equipment industry (21, 22).

116

117 • Low-exposure occupations were those which do not typically involve exposure to known  
118 or likely bladder carcinogens. They included clerical jobs (office jobs), construction  
119 workers, salesmanship, farming, and housekeeping. Employment for less than one year  
120 was also considered to pose low occupational risk across all types of occupations, hence  
121 categorized as low risk (21, 22).

122

123 • Duration of employment was classified as high risk if greater than 10 years and low risk if  
124 less than 10 years (23).

125

- 126 • Smoking status was categorized as non-smoker for those with no history of smoking or  
127 smoked fewer than 100 cigarettes in their lifetime, ex-smoker for individuals who had quit  
128 smoking for at least the past year, and smoker for current smokers (24).
- 129
- 130 • Water intake was considered low risk if greater than 1400 ml per day and high risk if less  
131 than 400 ml per day (15).
- 132
- 133 • Alcohol intake was categorized as heavy consumption for those consuming three or more  
134 drinks per day, and moderate consumption for those consuming fewer than three drinks per  
135 day (17).
- 136
- 137 • Analgesic use was defined as regular if used at least four times a week over the last month,  
138 and non-regular if used less frequently (18).

### 139 **Data Collection Procedures and Quality Assurance**

140 A pre-tested electronic questionnaire was developed based on relevant literature to align with the  
141 study objectives, covering socio-demographic characteristics, occupational risks, and non-  
142 occupational risks. Three BSc nurses from selected hospitals who were assigned for data  
143 collection underwent a one-day training session. Data collection began with BC patients. The  
144 collected data was categorized by age, sex, and smoking status to align with control group  
145 variables. Data consistency and completeness were verified before coding and analysis  
146 commenced.

147

## 148 **Statistical Analysis**

149 The extracted data underwent cleaning and analysis using SPSS version 26 software. Categorical  
150 covariates were summarized with frequencies and percentages while median with interquartile  
151 range was used for the numerical variable. Differences in underlying characteristics between  
152 cases and controls were assessed using the Chi-square test and Mann-Whitney U test with  
153 statistical significance set at  $p \leq 0.05$ . Assumptions for the Chi-square test were verified prior to  
154 analysis to ensure data adherence to criteria. Furthermore, as the numerical variable did not meet  
155 the normality assumption under the Kolmogorov-Smirnov and Shapiro-Wilk tests, the Mann-  
156 Whitney U test was utilized.

157  
158 To examine the association of occupational exposure to chemicals and BC, a multivariable  
159 binary logistic regression model was fitted. Variable selection was guided by univariate analysis  
160 at a significance level of 25% and by considering clinical relevance of the matched factors. The  
161 model generated adjusted odds ratios (AORs) with 95% CI, identifying variables with  $p \leq 0.05$   
162 as statistically associated with bladder cancer. The model fitness was evaluated using the  
163 Hosmer-Lemeshow test, yielding a p-value of 0.152, indicating good fit as the test did not reject  
164 the hypothesis of adequate fit to the data.

165

## 166 **RESULTS**

### 167 **Socio Demographic Characteristics**

168 Among the 303 patients studied, 90(29.7%) were cases and 213 (70.3%) were controls with 98%  
169 and 92% response rate respectively. Age ( $\pm 5$  years), sex, and smoking status were matched in  
170 68% (207) of the participants. The majority of the participants were age 60 years and above



171 (62.2% of cases, 59.1% of controls), male (72% of cases, 73% of controls) and non-smokers  
172 (61.1% of cases, 64.8% of controls). Ex-smokers were 21.1% of cases and 13.6% of controls,  
173 while current smokers were 17.8% of cases and 21.1% of controls. A significant proportion of  
174 participants were from Addis Ababa (53.1%), Oromia (19.1%), and Amhara (13.9%), with the  
175 remainder from various other regions of Ethiopia. Most participants had at least a primary  
176 education (67%) and earned an average monthly income of less than 10,000 birr (94.1%).

177  
178 Based on chi-square test result, a significantly higher proportion of bladder cancer patients had  
179 less than primary education (cannot read or write or can only read and write) compared to  
180 controls (61.1% vs. 21.1%,  $p < 0.001$ ). Otherwise, there was no significant difference in terms of  
181 other factors.

182  
183  
184 Table 2: Socio-demographic characteristics of study participants among patients in selected  
185 hospitals in Addis Ababa, Ethiopia, May 01 to August 31 2023 (n=303)

186  
187 **Non-Occupational Exposures**  
188 Having a first-degree family history of BC (6.7% VS 0%),  $p=0.001$ ), recurrent UTI (47.8% VS  
189 8.9%,  $p < 0.0001$ ), pelvic radiation (15.6% VS 4.2%,  $p=0.001$ ), schistosomiasis infection (4.4%  
190 VS 0.0%,  $p=0.007$ ), and better water intake i.e., at least 1.4 liters per day (87.8% VS 54.9%,  
191  $p < 0.0001$ ) were significantly higher among cases than controls.

192

193 In contrast, controls had a significantly higher proportion of individuals with a BMI of 25 and  
194 above (31% vs. 1.1%,  $p<0.0001$ ) and a history of receiving chemotherapy (7.5% vs. 0.0%,  
195  $p=0.003$ ) compared to cases.

196

197 A significantly higher proportion of cases consumed coffee (93.3% vs. 72.3%), with a frequency  
198 of 3 or more cups per day (50.0% vs. 14.6%) and a duration of more than 20 years (74.4% vs.  
199 50.2%) compared to controls, all with a p-value of  $<0.0001$ .

200

201 A significantly high proportion of BC patients used analgesics regularly ( $>4$  per week in the last  
202 month) and in a high amount (at least 10 tablets of painkiller per week) compared to controls  
203 (66.7% VS 37.6%,  $p<0.0001$ ) and (55.6% VS 20.7%,  $p<0.0001$ ) respectively. In addition, there  
204 is a significant difference in the proportion of type of analgesics taken by BC patients as  
205 compared to controls; opioids (31.4% VS 1.9%), NSAIDS (24.4% VS 22.1%), paracetamol  
206 (11.1% VS 10.3%) and aspirin (0.0% VS 3.3%) with a p value of  $<0.0001$ . On the other hand, all  
207 BC patients took analgesics for less than 8 years while a significant proportion of controls took  
208 painkillers for more than 8 years (0.0% VS 1.4%,  $p<0.0001$ ).

209

210 A significantly higher proportion of cases had factory near their residence compared to controls  
211 (14.4% VS 4.2%,  $p=0.002$ ). Additionally, the median (IQR) distance of factory from residence  
212 was 200.0 (115.0-325.0) meters with a statistically significant difference in the mean rank of the  
213 distance between BC patients and controls (51meters VS 103.47meters,  $p<0.0001$ ).

214

215 Table 2: Non occupational risk factors of bladder cancer comparisons between bladder cancer  
 216 patients and controls among patients in selected hospitals in Addis Ababa, Ethiopia, May 01 to  
 217 August 31 2023(n=303)

218

### 219 Occupational Exposures

220 The majority 255 (84.2%) of participants had low-exposure occupations, with 88.9% of cases  
 221 and 82.2% of controls falling into this category. From the various types of occupations collected  
 222 among participants, a statistically significant proportion of BC cases were farmers as compared  
 223 to controls (10.0% vs 7.5%,  $p<0.0001$ ). And a significant proportion of controls were employed  
 224 in office jobs and as merchants compared to cases (20.2% vs 1.1%,  $p<0.0001$ , 14.6% vs 3.3%,  
 225  $p<0.0001$ ). Regarding duration of employment, a significantly higher proportion of controls had  
 226 held one job for more than 10 years compared to cases (21.6% vs. 3.3%,  $p<0.0001$ ).  
 227 Additionally, a significant proportion of BC cases reported never having a job lasting more than  
 228 a year compared to controls (73.3% vs. 20.7%,  $p<0.0001$ ).

229

230 *Table 1: Occupational risk factors of bladder cancer, comparisons between bladder cancer*  
 231 *patients and controls among patients in selected hospitals in Addis Ababa, Ethiopia, May 01 to*  
 232 *August 31 2023 (n=303)*

| Variable          | Category      | Cases<br>(%)<br>(n=90) | Control<br>(%) (n=213) | Total (%)<br>(n=303) | P value            |
|-------------------|---------------|------------------------|------------------------|----------------------|--------------------|
| <b>Occupation</b> | Low exposure  | 80(88.9)               | 175(82.2)              | 255(84.2)            | 0.10               |
|                   | High exposure | 10(11.1)               | 38(17.8)               | 48(15.8)             |                    |
| <b>Occupation</b> | <1            | 66(73.3)               | 44(20.7)               | 110(36.3)            | <b>&lt;0.0001*</b> |

|                                          |                           |          |           |           |          |
|------------------------------------------|---------------------------|----------|-----------|-----------|----------|
| <b>duration (in years)</b>               | 1-10                      | 21(23.3) | 123(57.7) | 144(47.5) |          |
|                                          | >10                       | 3(3.3)   | 46(21.6)  | 49(16.2)  |          |
| <b>Specific occupations</b>              | No occupation for >1 year | 66(73.3) | 44(20.7)  | 110(36.3) | <0.0001* |
|                                          | Office                    | 1(1.1)   | 43(20.2)  | 44(14.5)  |          |
|                                          | Farming                   | 9(10.0)  | 16(7.5)   | 25(8.3)   |          |
|                                          | Merchant                  | 3(3.3)   | 31(14.6)  | 34(11.2)  |          |
|                                          | Other occupation          | 11(12.2) | 79(37.1)  | 90(29.7)  |          |
| <b>History of working in any factory</b> | No                        | 81(90.0) | 204(95.8) | 285(94.1) | 0.05     |
|                                          | Yes                       | 9(10.0)  | 9(4.2)    | 18(5.9)   |          |

233 \* = statistically significant; p values were calculated using Chi-square test.

#### 234 **Factors Associated with Bladder Cancer**

235 After conducting univariate analysis at a 25% significance level, occupational risk, educational  
 236 level, distance of factory from residence, source of drinking water, duration of coffee  
 237 consumption, and regular analgesic use were found to be significantly associated with bladder  
 238 cancer. In addition to these factors, clinical selection was done for age, sex, and smoking status  
 239 to be included in the multivariable analysis. In the multivariable binary logistic regression,  
 240 educational level, duration of coffee intake, and regular analgesic use were found to be

241 significantly associated with bladder cancer at a 5% significance level. However, occupational  
242 risk did not show a significant association with bladder cancer (AOR:1.09; 95%CI= 0.44, 2.74;  
243 P=0.85).

244  
245 The odds of developing BC were 88.2% lower among people who have at least a primary level  
246 of education as compared to people who cannot read or write. (AOR=0.12, 95%CI= 0.05, 0.30,  
247 P<0.0001).

248  
249 The odds of developing bladder cancer were 2.36 times higher among individuals who consumed  
250 coffee for more than 20 years compared to those who consumed less or did not drink coffee  
251 (AOR=2.36, 95% CI=1.22, 4.56, p=0.01).

252  
253 Regular analgesic use (at least four times a week in the past month) was associated with 6.60  
254 times higher odds of developing bladder cancer compared to non-regular users (<4 times a week  
255 in the past month) (AOR=6.60, 95% CI=3.34,13.02, p<0.0001).

256  
257 Table 3: Results for the final multivariable binary logistic regression model among patients in  
258 selected hospitals in Addis Ababa, Ethiopia, May to August 2023 (n=303)

## 259 **DISCUSSION**

260 The study aimed to investigate the association between occupational exposure to chemical  
261 substances and bladder cancer in Ethiopia. Out of 303 patients included, 90 (29.7%) had bladder  
262 cancer while 213 (70.3%) did not. Age, sex, and smoking status were matched in 68% of  
263 participants. Cases, compared to controls, had significantly higher proportions of individuals

264 with less than primary education, coffee consumption, regular analgesic use, better water intake,  
265 residence around factories, family history of bladder cancer, recurrent UTIs, pelvic radiation, and  
266 schistosomiasis infection. Conversely, controls showed a significantly higher proportion of  
267 individuals with BMI  $\geq$  25 and history of chemotherapy. Most participants, 255(84.2%) had low-  
268 exposure occupations (88.9% cases, 82.2% controls), with cases showing a significantly higher  
269 proportion of farmers, and controls more often employed in office jobs or as merchants.  
270 Significantly higher proportion of controls also had a single job lasting over 10 years, while a  
271 significant proportion of cases reported having a job lasting less than a year.

272  
273 After multivariable binary logistic regression analysis, the study did not identify a significant  
274 association between occupational exposures and BC, despite occupational factors being  
275 established as a risk according to The International Agency for Research on Cancer (IARC) (25).  
276 Past research has indicated that occupations lasting 10 or more years in high-risk fields are  
277 strongly linked to BC development (26). However, in this study, 73% of the bladder cancer  
278 participants had never held a job lasting more than one year, potentially reducing their exposure  
279 to occupational carcinogens. The lack of observed association in this study may also be due to  
280 the case-control ratio not providing sufficient statistical power.

281  
282 On the other hand, educational level, coffee consumption, and analgesic use were found to have  
283 a statistically significant association with BC. People with at least a primary level of education  
284 had 88.2% lower odds of developing BC as compared to people who cannot read or write. This  
285 could be attributed to educated individuals often choosing low-exposure occupations such as

286 office jobs. Moreover, higher education may promote healthier lifestyle habits such as increased  
287 fluid intake, smoking cessation, and prompt treatment of conditions like UTIs or schistosomiasis.

288

289 The study revealed that individuals who consumed coffee for more than 20 years had a 2.36  
290 times increased odds of developing bladder cancer. Coffee's dual nature—both potentially  
291 carcinogenic and antioxidant—has long been debated. Caffeine, a component of coffee, has been  
292 classified as potentially carcinogenic since the 1970s, and previous studies suggested a slight  
293 increase in bladder cancer risk associated with coffee consumption. This effect may be  
294 exacerbated by interactions with other environmental factors such as polycyclic aromatic  
295 hydrocarbons found in tobacco smoke, known to contribute to bladder cancer (27). From a  
296 clinical perspective, chemicals excreted through urine can directly affect the bladder wall before  
297 elimination, potentially leading to bladder cell dysplasia and cancer formation (1,28). However, a  
298 meta-analysis comprising studies from Europe, the USA, and Japan found no significant  
299 association between coffee consumption and bladder cancer (16). In this study, given Ethiopia's  
300 significant cultural consumption of coffee, a long duration of coffee intake (>20 years) was  
301 reported by 57.4% of participants. This may suggest a potential geographic variation in the  
302 prevalence of long-term coffee consumption and hence its association with BC.

303

304 In this study, individuals who regularly used analgesics were found to have 6.60 times higher  
305 odds of developing bladder cancer. Given that study participants were hospitalized and  
306 predominantly over 60 years old, chronic pain and regular analgesic use were expected. This  
307 finding aligns with previous research indicating that analgesics containing phenacetin can be  
308 carcinogenic to the urinary tract, particularly with prolonged use exceeding 8 years (18). The

309 literature on painkillers presents mixed findings regarding their impact on bladder cancer risk. A  
310 comprehensive meta-analysis incorporating 8 cohort studies and 9 case-control studies found no  
311 significant association between the use of paracetamol, aspirin, or other NSAIDs and bladder  
312 cancer risk (19). Similarly, this study did not identify a significant relationship between the use  
313 of various analgesics and BC, suggesting that the regular use of analgesics may be associated  
314 with BC rather than the specific type of drug used.

315  
316 The study's key strengths were the use of matching techniques and controlling a number of  
317 potential non-occupational factors. Although, the study was unable to assess specific chemical  
318 substances used in high exposure occupations due to recall bias. In addition, our study was  
319 conducted in hospital settings, which may not accurately reflect the conditions found in  
320 outpatient settings.

## 321 **CONCLUSIONS**

322 The study did not find an association between bladder cancer and occupational exposure to  
323 chemicals. However, level of education, long-term coffee consumption, and regular analgesic  
324 use were identified as having a significant association with bladder cancer in the setting. Health  
325 care professionals are advised to educate patients about safe analgesic use. Furthermore, future  
326 multicenter case-control studies should be conducted to further explore the potential associations  
327 of these factors with bladder cancer.

## 328 **LIST OF ABBREVIATIONS**

329 BC: Bladder cancer

330 IARC: International Agency for Research on Cancer

331 ILO: International Labor Organization



332 NSAIDs: Non-steroidal anti-inflammatory drugs

333 OHS: Occupational health services

334 PAHs: Polycyclic aromatic hydrocarbons

335 UTI: Urinary tract infection

## 336 **DECLARATION**

337

### 338 **Ethics approval and consent to participate**

339

340 The study was conducted after ethical clearance was obtained from the ethical committee of the  
341 School of Public Health at GAMBY Medical and Business College, Black Lion Specialized  
342 Hospital, St. Paul Hospital, and Addis Ababa Health Bureau. The ethical committees approved  
343 the use of verbal consent. Data collectors read and explained the informed consent to participants  
344 and documented consent on the Google Form sheet. The study posed no risks or negative  
345 consequences to the participants. Medical record numbers were used for data collection, and  
346 personal identifiers were not included in the research report to ensure confidentiality. Access to  
347 collected information was restricted to the principal investigator, and confidentiality was strictly  
348 maintained throughout the project.

349

350 **Consent for publication:** Not applicable

351

352 **Availability of data and materials:** The dataset used during the current study is available from  
353 the corresponding author on reasonable request.

354

355 **Competing interests:** The authors declared that they have no competing interests.

356

357 **Funding:** This research did not receive any specific grant from funding agencies in the public,  
358 commercial, or not-for-profit sectors.

359 **Authors' Contribution:** EAK conceived, designed, performed statistical analysis, and drafted  
360 the initial manuscript. TWL mentored and contributed to the design, statistical analysis,  
361 interpretation of findings and revision of the manuscript. All authors read and approved the final  
362 manuscript.

363 **Acknowledgment:** The authors would like to thank GAMBY Medical and Business College for  
364 providing the necessary resources throughout the research endeavor. The authors would also like  
365 to thank everyone involved in the research through data collection, supervision, and facilitation.

## 366 REFERENCES

- 367 1. Saginala K, Barsouk A, Aluru JS, Rawla P, Padala SA, Barsouk A. Epidemiology of  
368 Bladder Cancer. *Med Sci*. 2020 Mar;8(1):15.
- 369 2. Bladder cancer statistics | World Cancer Research Fund International [Internet]. WCRF  
370 International. [cited 2023 Feb 16]. Available from: [https://www.wcrf.org/cancer-](https://www.wcrf.org/cancer-trends/bladder-cancer-statistics/)  
371 [trends/bladder-cancer-statistics/](https://www.wcrf.org/cancer-trends/bladder-cancer-statistics/)
- 372 3. Bray F, Laversanne M, Sung H, et al. Global cancer statistics 2022: GLOBOCAN  
373 estimates of incidence and mortality worldwide for 36 cancers in 185 countries. *CA*  
374 *Cancer J Clin*. 2024; 74(3): 229-263. doi:[10.3322/caac.21834](https://doi.org/10.3322/caac.21834)

- 375 4. Zeegers MPA. Occupational risk factors for male bladder cancer: results from a  
376 population based case cohort study in the Netherlands. *Occup Environ Med*. 2001 Sep  
377 1;58(9):590–6.
- 378 5. Clin B, Paireon JC, “RecoCancerProf” Working Group. Medical follow-up for workers  
379 exposed to bladder carcinogens: the French evidence-based and pragmatic statement.  
380 *BMC Public Health*. 2014 Nov 6;14(1):1155.
- 381 6. Contemporary Occupational Carcinogen Exposure and Bladder Cancer: A Systematic  
382 Review and Meta-analysis | Global Health | JAMA Oncology | JAMA Network  
383 [Internet]. [cited 2023 Feb 17]. Available from:  
384 <https://jamanetwork.com/journals/jamaoncology/fullarticle/2451427>
- 385 7. Ploeg M, Aben KKH, Kiemeny LA. The present and future burden of urinary bladder  
386 cancer in the world. *World J Urol*. 2009 Jun;27(3):289–93.
- 387 8. Chris Laszcz-Davis. *The OSH Challenge: Understanding Our Emerging World and its*  
388 *Workforce Development Needs*
- 389 9. Farzaneh F, Mehrparvar AH, Lotfi MH. Occupations and the Risk of Bladder Cancer in  
390 Yazd Province: A Case-Control Study. *Int J Occup Environ Med*. 2017 Oct 1;8(4):191–8.
- 391 10. Sun JW, Zhao LG, Yang Y, Ma X, Wang YY, Xiang YB. Obesity and Risk of Bladder  
392 Cancer: A Dose-Response Meta-Analysis of 15 Cohort Studies. Koul HK, editor. *PLOS*  
393 *ONE*. 2015 Mar 24;10(3):e0119313.
- 394 11. Pesch B, Haerting J, Ranft U, Klimpel A, Oelschlägel B, Schill W, et al. Occupational  
395 risk factors for urothelial carcinoma: agent-specific results from a case-control study in  
396 Germany. *Int J Epidemiol*. 2000 Apr 1;29(2):238–47.

- 397 12. Vermeulen SH, Hanum N, Grotenhuis AJ, Castaño-Vinyals G, van der Heijden AG,  
398 Aben KK, et al. Recurrent urinary tract infection and risk of bladder cancer in the  
399 Nijmegen bladder cancer study. *Br J Cancer*. 2015 Feb;112(3):594–600.
- 400 13. Bermejo JL, Sundquist J, Hemminki K. Sex-specific familial risks of urinary bladder  
401 cancer and associated neoplasms in Sweden. *Int J Cancer*. 2009;124(9):2166–71.
- 402 14. Bladder Cancer Risk Factors [Internet]. [cited 2023 Feb 16]. Available from:  
403 <https://www.cancer.org/cancer/bladder-cancer/causes-risks-prevention/risk-factors.html>
- 404 15. Michaud DS, Kogevinas M, Cantor KP, Villanueva CM, Garcia-Closas M, Rothman N,  
405 et al. Total Fluid and Water Consumption and the Joint Effect of Exposure to  
406 Disinfection By-Products on Risk of Bladder Cancer. *Environ Health Perspect*. 2007  
407 Nov;115(11):1569–72.
- 408 16. Loomis D, Guyton KZ, Grosse Y, Lauby-Secretan B, El Ghissassi F, Bouvard V, et al.  
409 Carcinogenicity of drinking coffee, mate, and very hot beverages. *Lancet Oncol*. 2016  
410 Jul;17(7):877–8.
- 411 17. Pelucchi C, Galeone C, Tramacere I, Bagnardi V, Negri E, Islami F, et al. Alcohol  
412 drinking and bladder cancer risk: a meta-analysis. *Ann Oncol*. 2012 Jun;23(6):1586–93.
- 413 18. Fortuny J, Kogevinas M, Zens MS, Schned A, Andrew AS, Heaney J, et al. Analgesic  
414 and anti-inflammatory drug use and risk of bladder cancer: a population based case  
415 control study. *BMC Urol*. 2007 Dec;7(1):13.
- 416 19. Zhang H, Jiang D, Li X. Use of Nonsteroidal Anti-Inflammatory Drugs and Bladder  
417 Cancer Risk: A Meta-Analysis of Epidemiologic Studies. Aggarwal BB, editor. *PLoS*  
418 *ONE*. 2013 Jul 19;8(7):e70008.

- 419 20. Zhang Y, Rungay H, Li M, Yu H, Pan H, Ni J. The global landscape of bladder cancer  
420 incidence and mortality in 2020 and projections to 2040. *J Glob Health*. 2023 Sep  
421 15;13:04109. doi: 10.7189/jogh.13.04109. PMID: 37712386; PMCID: PMC10502766.
- 422 21. Aminian O, Saburi A, Mohseni H, Akbari H, Chavoshi F, Akbari H. Occupational risk of  
423 bladder cancer among Iranian male workers. *Urol Ann*. 2014;6(2):135–8.
- 424 22. Rom WN. *Environmental and occupational medicine*. 4th ed. Philadelphia: Lippincott  
425 Williams & Wilkins; 2007.
- 426 23. Cassidy A, Wang W, Wu X, Lin J. Risk of urinary bladder cancer: a case-control analysis  
427 of industry and occupation. *BMC Cancer*. 2009 Dec;9(1):443.
- 428 24. Ferrís J, Garcia J, Berbel O, Ortega JA. Constitutional and occupational risk factors  
429 associated with bladder cancer. *Actas Urol Esp Engl Ed*. 2013 Sep 1;37(8):513–22.
- 430 25. Jubber I, Ong S, Bukavina L, Black PC, Compérat E, Kamat AM, et al. Epidemiology of  
431 Bladder Cancer in 2023: A Systematic Review of Risk Factors. *Eur Urol*. 2023  
432 Aug;84(2):176–
- 433 26. Samanic CM, Kogevinas M, Silverman DT, Tardon A, Serra C, Malats N, et al.  
434 Occupation and bladder cancer in a hospital-based case-control study in Spain. *Occup  
435 Environ Med*. 2008 May
- 436 27. Gruber K. Coffee consumption and bladder cancer are linked, analysis shows. *BMJ*. 2015  
437 Mar 18;350(mar18 16):h1477–h1477.
- 438 28. Sung H, Ferlay J, Siegel RL, Laversanne M, Soerjomataram I, Jemal A, et al. Global  
439 Cancer Statistics 2020: GLOBOCAN Estimates of Incidence and Mortality Worldwide  
440 for 36 Cancers in 185 Countries. *CA Cancer J Clin*. 2021 May;71(3):209–49  
441

442

443

444

445

446 *Table 2: Socio-demographic characteristics of study participants among patients in selected*  
 447 *hospitals in Addis Ababa, Ethiopia, May 01 to August 31 2023 (n=303)*

| <b>Variable</b>                        | <b>Category</b> | <b>Cases (%)<br/>(n=90)</b> | <b>Control<br/>(%)<br/>(n=213)</b> | <b>Total (%)<br/>(n=303)</b> | <b>P value</b> |
|----------------------------------------|-----------------|-----------------------------|------------------------------------|------------------------------|----------------|
| <b>Age (in years)</b>                  | ≤49             | 14(15.6)                    | 21 (9.9)                           | 35(11.6)                     | 0.10           |
|                                        | 50-59           | 20 (22.2)                   | 66(31.0)                           | 86(28.4)                     |                |
|                                        | 60-69           | 26(28.9)                    | 75(35.2)                           | 101(33.3)                    |                |
|                                        | ≥70             | 30(33.3)                    | 51(23.9)                           | 81(26.7)                     |                |
| <b>Sex</b>                             | Female          | 25(27.8)                    | 56(26.3)                           | 81(26.7)                     | 0.45           |
|                                        | Male            | 65(72.2)                    | 157(73.7)                          | 222(73.3)                    |                |
| <b>Monthly<br/>income (in<br/>ETB)</b> | ≤4999           | 30(33.3)                    | 93(43.7)                           | 123(40.6)                    | 0.07           |
|                                        | 5000-9999       | 57(63.3)                    | 105(49.3)                          | 162(53.5)                    |                |
|                                        | ≥10,000         | 3(3.3)                      | 15(7.0)                            | 18(5.9)                      |                |

|                  |                      |          |           |           |          |
|------------------|----------------------|----------|-----------|-----------|----------|
| <b>Education</b> | Cannot read or write | 18(20.0) | 17(8.0)   | 35(11.6)  | <0.0001* |
|                  | Can read and write   | 37(41.1) | 28(13.1)  | 65(21.5)  |          |
|                  | Primary education    | 19(21.1) | 54(25.4)  | 73(24.1)  |          |
|                  | Secondary education  | 12(13.3) | 50(23.5)  | 62(20.5)  |          |
|                  | Diploma and above    | 4(4.4)   | 64(30.0)  | 68(22.4)  |          |
| <b>Region</b>    | Addis Ababa          | 43(47.8) | 118(55.4) | 161(53.1) | 0.26     |
|                  | Oromia               | 18(20.0) | 40(18.8)  | 58(19.1)  |          |
|                  | Amhara               | 15(16.7) | 27(12.7)  | 42(13.9)  |          |
|                  | Others               | 14(15.5) | 28(13.1)  | 42(13.8)  |          |

448 ETB= Ethiopian birr; \* = statistically significant; p values were calculated using Chi-Square test.

449

450 *Table 2: Non occupational risk factors of bladder cancer comparisons between bladder cancer*  
 451 *patients and controls among patients in selected hospitals in Addis Ababa, Ethiopia, May 01 to*  
 452 *August 31 2023(n=303)*

| <b>Variable</b>       | <b>Category</b> | <b>Cases<br/>(n=90)<br/>(%)</b> | <b>Control<br/>(n=213)<br/>(%)</b> | <b>Total<br/>(n=303)<br/>(%)</b> | <b>P value</b> |
|-----------------------|-----------------|---------------------------------|------------------------------------|----------------------------------|----------------|
| <b>Smoking status</b> | Non-smoker      | 55 (61.1)                       | 139 (65.3)                         | 194 (64.0)                       | 0.26           |

|                                         |           |           |             |            |                    |
|-----------------------------------------|-----------|-----------|-------------|------------|--------------------|
|                                         | Ex-smoker | 19 (21.1) | 29 (13.6)   | 48 (15.8)  |                    |
|                                         | Smoker    | 16 (17.8) | 45 (21.1)   | 61 (20.1)  |                    |
| <b>Family history of bladder cancer</b> | No        | 84 (93.3) | 213 (100.0) | 297 (98.0) | <b>0.001*</b>      |
|                                         | Yes       | 6 (6.7)   | 0 (0.0)     | 6 (2.0)    |                    |
| <b>Recurrent UTI</b>                    | No        | 47 (52.2) | 194 (91.1)  | 241 (79.5) | <b>&lt;0.0001*</b> |
|                                         | Yes       | 43 (47.8) | 19 (8.9)    | 62 (20.5)  |                    |
| <b>History of pelvic radiation</b>      | No        | 76 (84.4) | 204 (95.8)  | 280 (92.4) | <b>0.001*</b>      |
|                                         | Yes       | 14 (15.6) | 9 (4.2)     | 23 (7.6)   |                    |
| <b>History of schistosomiasis</b>       | No        | 86 (95.6) | 213 (100.0) | 299 (98.7) | <b>0.007*</b>      |
|                                         | Yes       | 4 (4.4)   | 0 (0.0)     | 4 (1.3)    |                    |
| <b>Water intake per day (in liters)</b> | <1.4      | 11 (12.2) | 96 (45.1)   | 107 (35.3) | <b>&lt;0.0001*</b> |
|                                         | ≥1.4      | 79 (87.8) | 117 (54.9)  | 196 (64.7) |                    |
| <b>Source of water</b>                  | Tap       | 77 (85.6) | 169 (79.3)  | 246 (81.2) | 0.11               |
|                                         | Bottled   | 10 (11.1) | 41 (19.2)   | 51 (16.8)  |                    |
|                                         | Stream    | 3 (3.3)   | 3 (1.4)     | 6 (2.0)    |                    |
| <b>BMI</b>                              | <18.5     | 0 (0.0)   | 9 (4.2)     | 9 (4.2)    | <b>&lt;0.0001*</b> |
|                                         | 18.5-24.9 | 89 (98.9) | 138 (64.8)  | 227 (74.9) |                    |
|                                         | 25-29.9   | 1 (1.1)   | 62 (29.1)   | 63 (20.8)  |                    |



|                                                    |             |            |            |            |                    |
|----------------------------------------------------|-------------|------------|------------|------------|--------------------|
|                                                    | ≥30         | 0 (0.0)    | 4 (1.9)    | 4 (1.3)    |                    |
| <b>History of receiving Chemotherapy</b>           | No          | 90 (100.0) | 197 (92.5) | 287 (94.7) | <b>0.003*</b>      |
|                                                    | Yes         | 0 (0.0)    | 16 (7.5)   | 16 (5.3)   |                    |
| <b>Coffee use</b>                                  | No          | 6(6.7)     | 59(27.7)   | 65(21.5)   | <b>&lt;0.0001*</b> |
|                                                    | Yes         | 84(93.3)   | 154(72.3)  | 238(78.5)  |                    |
| <b>Coffee (cups per day)</b>                       | <3          | 45(50.0)   | 182(85.4)  | 227(74.9)  | <b>&lt;0.0001*</b> |
|                                                    | ≥3          | 45(50.0)   | 31(14.6)   | 76(25.1)   |                    |
| <b>Coffee use duration (in years)</b>              | <20         | 23 (25.6)  | 106 (49.8) | 129 (42.6) | <b>&lt;0.0001*</b> |
|                                                    | ≥20         | 67 (74.4)  | 107 (50.2) | 174 (57.4) |                    |
| <b>Alcohol use</b>                                 | No          | 40 (44.4)  | 94 (44.1)  | 134 (44.2) | 0.53               |
|                                                    | Yes         | 50 (55.6)  | 119 (55.9) | 169 (55.8) |                    |
| <b>Alcohol drinks per day (in bottle or glass)</b> | Non drinker | 40 (44.4)  | 94 (44.1)  | 134 (44.2) | 0.12               |
|                                                    | <3          | 15 (16.7)  | 19 (8.9)   | 34 (11.2)  |                    |
|                                                    | ≥3          | 35 (38.9)  | 100 (46.9) | 135 (44.6) |                    |
| <b>Alcohol use duration (in years)</b>             | Non drinker | 40 (44.4)  | 94 (44.1)  | 134 (44.2) | 0.60               |
|                                                    | 1-14        | 18 (20.0)  | 32 (15.0)  | 50 (16.5)  |                    |
|                                                    | 15-29       | 27 (30.0)  | 68 (31.9)  | 95 (31.4)  |                    |
|                                                    | ≥30         | 5 (5.6)    | 19 (8.9)   | 24 (7.9)   |                    |

|                                                                  |             |           |            |            |                    |
|------------------------------------------------------------------|-------------|-----------|------------|------------|--------------------|
| <b>Alcohol type</b>                                              | Non drinker | 40 (44.4) | 94 (44.1)  | 134 (44.2) | 0.34               |
|                                                                  | Beer        | 25 (27.8) | 74 (34.7)  | 99 (32.7)  |                    |
|                                                                  | Others      | 45 (21.1) | 25 (27.8)  | 70 (23.1)  |                    |
| <b>Analgesics regular use (&gt;4 per week in the last month)</b> | No          | 30 (33.3) | 133 (62.4) | 163 (53.8) | <b>&lt;0.0001*</b> |
|                                                                  | Yes         | 60 (66.7) | 80 (37.6)  | 140 (46.2) |                    |
| <b>Analgesics type</b>                                           | Non user    | 30 (33.3) | 133 (62.4) | 163 (53.8) | <b>&lt;0.0001*</b> |
|                                                                  | NSAIDs      | 22 (24.4) | 54 (25.4)  | 76 (25.1)  |                    |
|                                                                  | Opioid      | 28 (31.1) | 4 (1.9)    | 32 (10.6)  |                    |
|                                                                  | Paracetamol | 10 (11.1) | 22 (10.3)  | 32 (10.6)  |                    |
| <b>Analgesics amount (tablets per week)</b>                      | <10         | 40 (44.4) | 169 (79.3) | 46 (69.0)  | <b>&lt;0.0001*</b> |
|                                                                  | ≥10         | 50 (55.6) | 44 (20.7)  | 94 (31.0)  |                    |
| <b>Analgesics duration (in years)</b>                            | Non taker   | 30 (33.3) | 133 (62.4) | 163 (53.8) | <b>&lt;0.0001*</b> |
|                                                                  | <8          | 60 (66.7) | 77 (36.2)  | 137 (45.2) |                    |
|                                                                  | ≥8          | 0 (0.0)   | 3 (1.4)    | 3 (1.0)    |                    |
| <b>Factory near residence</b>                                    | No          | 77 (85.6) | 204 (95.8) | 281 (92.7) | <b>0.003*</b>      |
|                                                                  | Yes         | 13 (14.4) | 9 (4.2)    | 22 (7.3)   |                    |
| <b>Distance of factory from residence</b>                        |             | 51        | 103.47     |            | <b>&lt;0.0001*</b> |

|             |  |  |  |  |
|-------------|--|--|--|--|
| (in meters) |  |  |  |  |
|-------------|--|--|--|--|

453 BMI, Body mass index; UTI, Urinary tract infection; NSAIDs, Nonsteroidal anti-inflammatory  
 454 drugs; \* statistically significant; p values were calculated using Chi-square test and Mann-  
 455 Whitney U test.

456

457 *Table 3: Results for the final multivariable binary logistic regression model among patients in*  
 458 *selected hospitals in Addis Ababa, Ethiopia, May to August 2023 (n=303)*

| Variable                 | Category                          | COR (95% CI)    | AOR (95% CI)      | P value  |
|--------------------------|-----------------------------------|-----------------|-------------------|----------|
| <b>Age</b>               | <60                               | 1               | 1                 | 0.79     |
|                          | >60                               | 1.14(0.69,1.89) | 1.09(0.59,2.01)   |          |
| <b>Sex</b>               | Female                            | 1               | 1                 | 0.23     |
|                          | Male                              | 0.93(0.53,1.61) | 1.57 (0.75, 3.28) |          |
| <b>Smoking status</b>    | Non-smoker                        | 1               | 1                 | 0.27     |
|                          | Ex-smoker                         | 1.66(0.86,3.20) | 1.22 (0.52,2.87)  | 0.64     |
|                          | Smoker                            | 0.90(0.47,1.72) | 0.57 (0.24,1.32)  | 0.19     |
| <b>Educational level</b> | Cannot read or write              | 1               | 1                 | <0.0001* |
|                          | Can read and write                | 1.25(0.55,2.85) | 0.84(0.33,2.17)   | 0.72     |
|                          | Primary level education and above | 0.20(0.09,0.42) | 0.12(0.05,0.30)   | <0.0001* |

|                                                          |               |                 |                    |                    |
|----------------------------------------------------------|---------------|-----------------|--------------------|--------------------|
| <b>Occupation</b>                                        | Low risk      | 1               | 1                  | 0.85               |
|                                                          | High risk     | 0.58(0.27,1.21) | 1.09(0.44, 2.74)   |                    |
| <b>Source of water</b>                                   | Tap or Stream | 1               | 1                  | 0.46               |
|                                                          | Bottled       | 0.52(0.25,1.10) | 0.710(0.29, 1.75)  |                    |
| <b>Coffee use duration (in years)</b>                    | <20           | 1               | 1                  | <b>0.010*</b>      |
|                                                          | ≥20           | 2.89(1.67,4.97) | 2.362 (1.22, 4.56) |                    |
| <b>Analgesics use (&gt;4 per week in the last month)</b> | No            | 1               | 1                  | <b>&lt;0.0001*</b> |
|                                                          | Yes           | 3.33(1.98,5.59) | 6.60(3.34,13.02)   |                    |
| <b>Distance of factory from residence (in meters)</b>    |               | 1.00(1.00,1.01) | 1.00(1.00,1.01)    | 0.06               |

459 COR= Crude odds ratio; AOR= Adjusted odds ratio; \* = statistically significant; p values were

460 calculated using multivariable binary logistic regression

461
